# Supplementary material for: Comparative Phylogeography in Rainforest Trees from Lower Guinea, Africa
Source: PLoS One. 2014 Jan 8;9(1):e84307. doi: 10.1371/journal.pone.0084307 (PMC3885573; doi:10.1371/journal.pone.0084307)
Supplement: Table S1 — Geographical location, sample and voucher information of the plant material included in dataset 1. (XLSX) [file pone.0084307.s001.xlsx]

## Sheet: suptable
SampleID	Species	Family	Latitude	Longitude	Sampled by	Voucher	Herbarium	Genbank Accession	Country	Locality
MH0715	Anthonotha macrophylla P.Beauv.	Fabaceae (Caesalpinioideae)	0.5367	9.349	Heuertz M	MH11/MH0715	LBV/BRLU	KF487767	Gabon	road Cap Estérias - Santa Clara
MH0724	Anthonotha macrophylla P.Beauv.	Fabaceae (Caesalpinioideae)	0.3407	9.3492	Heuertz M			KF487768	Gabon	Pointe Denis
MH0725	Anthonotha macrophylla P.Beauv.	Fabaceae (Caesalpinioideae)	0.3407	9.3492	Heuertz M			KF487769	Gabon	Pointe Denis
MH0757	Anthonotha macrophylla P.Beauv.	Fabaceae (Caesalpinioideae)	-1.6297	12.2824	Heuertz M			KF487770	Gabon	Popa
MH0759	Anthonotha macrophylla P.Beauv.	Fabaceae (Caesalpinioideae)	-1.6156	12.2796	Heuertz M			KF487771	Gabon	Popa
MH0906	Anthonotha macrophylla P.Beauv.	Fabaceae (Caesalpinioideae)	-0.2258	11.5811	Heuertz M			KF487772	Gabon	La Lopé
MH0910	Anthonotha macrophylla P.Beauv.	Fabaceae (Caesalpinioideae)	-0.2229	11.5829	Heuertz M			KF487773	Gabon	La Lopé
MH1407	Anthonotha macrophylla P.Beauv.	Fabaceae (Caesalpinioideae)	2.3668	13.4172	Heuertz M	MH1407	YA/BRLU	KF487774	Cameroon	Lélé
MH1444	Anthonotha macrophylla P.Beauv.	Fabaceae (Caesalpinioideae)	2.376	13.4309	Heuertz M	MH1444	YA/BRLU	KF487775	Cameroon	Lélé
OH0569	Anthonotha macrophylla P.Beauv.	Fabaceae (Caesalpinioideae)	4.79374	9.67823	Heuertz M			KF487776	Cameroon	Mont Koupe
OH0582	Anthonotha macrophylla P.Beauv.	Fabaceae (Caesalpinioideae)	4.79374	9.67823	Heuertz M			KF487777	Cameroon	Mont Koupe
OH0748	Anthonotha macrophylla P.Beauv.	Fabaceae (Caesalpinioideae)	5.0605	8.8346	Heuertz M			KF487778	Cameroon	Korup NP
OH0749	Anthonotha macrophylla P.Beauv.	Fabaceae (Caesalpinioideae)	5.0605	8.8346	Heuertz M			KF487779	Cameroon	Korup NP
OH0750	Anthonotha macrophylla P.Beauv.	Fabaceae (Caesalpinioideae)	5.0605	8.8346	Heuertz M			KF487780	Cameroon	Korup plot
OH0751	Anthonotha macrophylla P.Beauv.	Fabaceae (Caesalpinioideae)	5.0605	8.8346	Heuertz M			KF487781	Cameroon	Korup plot
OH1686	Anthonotha macrophylla P.Beauv.	Fabaceae (Caesalpinioideae)	-2.3943	9.6332	Issembé Y			KF487782	Gabon	Luango
OH1690	Anthonotha macrophylla P.Beauv.	Fabaceae (Caesalpinioideae)	-2.3878	9.618	Issembé Y			KF487783	Gabon	Luango
MH0732	Baillonella toxisperma Pierre	Sapotaceae	-1.6153	12.2707	Heuertz M			KF487826	Gabon	Popa
MH0774	Baillonella toxisperma Pierre	Sapotaceae	-1.648	12.289	Heuertz M			KF487827	Gabon	Popa
MH0917	Baillonella toxisperma Pierre	Sapotaceae	-0.2181	11.5824	Heuertz M			KF487828	Gabon	La Lopé
MH0951	Baillonella toxisperma Pierre	Sapotaceae	-0.1742	11.5764	Heuertz M			KF487829	Gabon	La Lopé
MH0952	Baillonella toxisperma Pierre	Sapotaceae	-2.6701	11.2517	Heuertz M			KF487830	Gabon	Douano
MH0963	Baillonella toxisperma Pierre	Sapotaceae	-2.673	11.251	Heuertz M			KF487831	Gabon	Douano
MH1137	Baillonella toxisperma Pierre	Sapotaceae	3.1135	14.1486	Daïnou K			KF487832	Cameroon	REGRMT
MH1179	Baillonella toxisperma Pierre	Sapotaceae	3.0807	13.9774	Daïnou K			KF487833	Cameroon	REGRMT
MH1414	Baillonella toxisperma Pierre	Sapotaceae	2.3671	13.4192	Daïnou K	MH1414	YA/BRLU	KF487834	Cameroon	Lélé
MH1442	Baillonella toxisperma Pierre	Sapotaceae	2.3757	13.4302	Daïnou K			KF487835	Cameroon	Lélé
OH0826	Baillonella toxisperma Pierre	Sapotaceae	5.0605	8.8346	Hardy O			KF487836	Cameroon	Korup NP
OH0828	Baillonella toxisperma Pierre	Sapotaceae	5.0605	8.8346	Hardy O			KF487837	Cameroon	Korup NP
OH1552	Baillonella toxisperma Pierre	Sapotaceae	-2.7651	10.1496	Issembé Y			KF487838	Gabon	Gamba
JD0016	Carapa parviflora Harms	Meliaceae	5.0615	8.8535	Duminil J			KF487809	Cameroon	Korup plot
JD0091	Carapa parviflora Harms	Meliaceae	5.0623	8.8551	Duminil J			KF487810	Cameroon	Korup plot
MH0691	Carapa parviflora Harms	Meliaceae	0.5439	9.3318	Heuertz M	MH3/MH0691	LBV/BRLU	KF487811	Gabon	Cap Estérias
MH0747	Carapa parviflora Harms	Meliaceae	-1.6148	12.2756	Heuertz M			KF487812	Gabon	Popa
MH0763	Carapa parviflora Harms	Meliaceae	-1.632	12.2832	Heuertz M			KF487813	Gabon	Popa
MH1032	Carapa parviflora Harms	Meliaceae	0.6336	10.3783	Heuertz M			KF487814	Gabon	Crystal Mountains
MH1443	Carapa parviflora Harms	Meliaceae	2.376	13.4309	Heuertz M			KF487815	Cameroon	Lélé
OH0102	Carapa parviflora Harms	Meliaceae	0.5779	9.3352	Hardy O	OH5/OH0102	LBV	KF487816	Gabon	Mondha forest
OH0126	Carapa parviflora Harms	Meliaceae	0.5006	12.793	Hardy O	OH29/OH0126	LBV	KF487817	Gabon	Makokou - IRET
OH0142	Carapa parviflora Harms	Meliaceae	-0.1146	11.5823	Hardy O			KF487818	Gabon	Lopé
OH0403	Carapa parviflora Harms	Meliaceae	3.29187	14.1878	Hardy O			KF487819	Cameroon	Mindourou
OH0405	Carapa parviflora Harms	Meliaceae	3.29187	14.1878	Hardy O			KF487820	Cameroon	Mindourou
OH0524	Carapa parviflora Harms	Meliaceae	3.97029	9.26122	Hardy O			KF487821	Cameroon	Limbe (Bimbia Community Forest)
OH0526	Carapa parviflora Harms	Meliaceae	3.97029	9.26122	Hardy O	DK 2104	YA/BRLU	KF487822	Cameroon	Limbe (Bimbia Community Forest)
OH0531	Carapa parviflora Harms	Meliaceae	3.97029	9.26122	Hardy O	DK 2105	YA/BRLU	KF487823	Cameroon	Limbe (Bimbia Community Forest)
OH0533	Carapa parviflora Harms	Meliaceae	3.97029	9.26122	Hardy O			KF487824	Cameroon	Limbe (Bimbia Community Forest)
OH0534	Carapa parviflora Harms	Meliaceae	3.97029	9.26122	Hardy O			KF487825	Cameroon	Limbe (Bimbia Community Forest)
JD0569	Ceiba pentandra (L.) Gaertn.	Malvaceae	3.7859	13.8881	Duminil J			KF487798	Cameroon	UFA31
MH0909	Ceiba pentandra (L.) Gaertn.	Malvaceae	-0.2229	11.5829	Heuertz M			KF487799	Gabon	La Lopé
OH0092	Ceiba pentandra (L.) Gaertn.	Malvaceae	-1.3359	13.1127	Hardy O			KF487800	Gabon	Lastourville
OH0093	Ceiba pentandra (L.) Gaertn.	Malvaceae	-0.8155	12.7334	Hardy O			KF487801	Gabon	Lastourville
OH0094	Ceiba pentandra (L.) Gaertn.	Malvaceae	0.536	11.4664	Hardy O			KF487802	Gabon	Mitzic
OH0095	Ceiba pentandra (L.) Gaertn.	Malvaceae	0.5081	12.798	Hardy O			KF487803	Gabon	Makokou - IRET
OH0112	Ceiba pentandra (L.) Gaertn.	Malvaceae	0.4181	9.4456	Hardy O	OH15/OH0112	LBV	KF487804	Gabon	Libreville University campus
OH0536	Ceiba pentandra (L.) Gaertn.	Malvaceae	3.97029	9.26122	Hardy O			KF487805	Cameroon	Limbe (Bimbia Community Forest)
OH0537	Ceiba pentandra (L.) Gaertn.	Malvaceae	3.97029	9.26122	Hardy O			KF487806	Cameroon	Limbe (Bimbia Community Forest)
OH0810	Ceiba pentandra (L.) Gaertn.	Malvaceae	5.08806	8.85744	Hardy O			KF487807	Cameroon	Korup NP
OH0811	Ceiba pentandra (L.) Gaertn.	Malvaceae	5.08806	8.85744	Hardy O			KF487808	Cameroon	Korup NP
GK0161	Coula edulis Baill.	Olacaceae	0.51965	12.7921	Koffi G			KF488057	Gabon	Makokou-IRET
MH0701	Coula edulis Baill.	Olacaceae	0.5439	9.3318	Heuertz M			KF488058	Gabon	Mondha forest
MH0726	Coula edulis Baill.	Olacaceae	0.3407	9.3492	Heuertz M			KF488059	Gabon	Pointe Denis
MH0957	Coula edulis Baill.	Olacaceae	-2.6715	11.251	Heuertz M			KF488060	Gabon	Douano
MH1012	Coula edulis Baill.	Olacaceae	-2.6489	11.2521	Heuertz M			KF488061	Gabon	Douano
MH1036	Coula edulis Baill.	Olacaceae	0.6336	10.3783	Heuertz M			KF488062	Gabon	Crystal Mountains
MH1052	Coula edulis Baill.	Olacaceae	0.6283	10.3794	Heuertz M			KF488063	Gabon	Crystal Mountains
MH1494	Coula edulis Baill.	Olacaceae	2.8345	11.129	Heuertz M	MH1494	YA/BRLU	KF488064	Cameroon	Biyeyem
MH1508	Coula edulis Baill.	Olacaceae	2.8344	11.13	Heuertz M			KF488065	Cameroon	Biyeyem
OH0103	Coula edulis Baill.	Olacaceae	0.5749	9.3345	Hardy O	OH6/OH0103	LBV	KF488066	Gabon	Mondha forest
OH0115	Coula edulis Baill.	Olacaceae	0.0085	12.7991	Hardy O	OH18/OH0115	LBV	KF488067	Gabon	Makokou - IRET
OH0767	Coula edulis Baill.	Olacaceae	5.07192	8.83585	Hardy O	OH0767		KF488068	Cameroon	Korup plot
OH0768	Coula edulis Baill.	Olacaceae	5.07192	8.83585	Hardy O			KF488069	Cameroon	Korup plot
OH0769	Coula edulis Baill.	Olacaceae	5.07192	8.83585	Hardy O	OH0769		KF488070	Cameroon	Korup plot
OH0770	Coula edulis Baill.	Olacaceae	5.08806	8.85744	Hardy O			KF488071	Cameroon	Korup NP
OH1561	Coula edulis Baill.	Olacaceae	-2.7706	10.1491	Issembé Y			KF488072	Gabon	Gamba
OH1562	Coula edulis Baill.	Olacaceae	-2.7666	10.1509	Issembé Y			KF488073	Gabon	Gamba
OH1563	Coula edulis Baill.	Olacaceae	-2.3836	10.171	Issembé Y			KF488074	Gabon	Doudou NP
GK0203	Diospyros mannii Hiern	Ebenaceae	1.11535	13.2229	Koffi G	GK203	YA/BRLU	KF487784	Gabon	Bélinga
MH0668	Diospyros mannii Hiern	Ebenaceae	1.3611	9.53	Senterre & Obiang	BS4157	BRLU	KF487785	Equatorial Guinea	Ndoté
MH0669	Diospyros mannii Hiern	Ebenaceae	1.3488	9.5166	Senterre & Obiang	BS4241	BRLU	KF487786	Equatorial Guinea	Ndoté
MH0670	Diospyros mannii Hiern	Ebenaceae	1.6124	10.1072	Senterre & Obiang	BS3964	BRLU	KF487787	Equatorial Guinea	Monte Alén NP
MH0845	Diospyros mannii Hiern	Ebenaceae	-0.2206	11.5795	Heuertz M			KF487788	Gabon	La Lopé
MH0901	Diospyros mannii Hiern	Ebenaceae	-0.2248	11.579	Heuertz M			KF487789	Gabon	La Lopé
OH0120	Diospyros mannii Hiern	Ebenaceae	0.5084	12.8013	Hardy O	OH0120	LBV	KF487790	Gabon	Makokou - IRET
OH0143	Diospyros mannii Hiern	Ebenaceae	-0.2138	11.6148	Hardy O			KF487791	Gabon	Lopé
OH0771	Diospyros mannii Hiern	Ebenaceae	5.07192	8.83585	Hardy O	OH0771	YA/BRLU	KF487792	Cameroon	Korup plot
OH0773	Diospyros mannii Hiern	Ebenaceae	5.07192	8.83585	Hardy O			KF487793	Cameroon	Korup plot
OH1553	Diospyros mannii Hiern	Ebenaceae	-2.7695	10.2235	Issembé Y	Dima1 / Issembé 1022	YA	KF487794	Gabon	Gamba
OH1555	Diospyros mannii Hiern	Ebenaceae	-2.3843	10.173	Issembé Y	Dima3	YA	KF487795	Gabon	Gamba
OH1669	Diospyros mannii Hiern	Ebenaceae	-2.389	10.132	Issembé Y	Issembé 1038	YA	KF487796	Gabon	PNDoudou
OH1673	Diospyros mannii Hiern	Ebenaceae	-2.389	10.14	Issembé Y			KF487797	Gabon	PNDoudou
JD0581	Erythrophleum suaveolens (Guill. & Perr.) Brenan	Fabaceae (Caesalpinioideae)	3.80034	13.853	Equipe Nature+			KF488018	Cameroon	UFA10-031
JD0585	Erythrophleum suaveolens (Guill. & Perr.) Brenan	Fabaceae (Caesalpinioideae)	3.79689	13.8558	Equipe Nature+			KF488019	Cameroon	UFA10-031
MH0658	Erythrophleum ivorense A. Chev.	Fabaceae (Caesalpinioideae)	1.5937	10.055	Senterre & Ngomo	BS659	BRLU	KF488020	Equatorial Guinea	Monte Alén
MH0687	Erythrophleum ivorense A. Chev.	Fabaceae (Caesalpinioideae)	0.5439	9.3318	Heuertz M			KF488021	Gabon	Cap Estérias
MH0689	Erythrophleum ivorense A. Chev.	Fabaceae (Caesalpinioideae)	0.5439	9.3318	Heuertz M	MH2/MH0689	LBV/BRLU	KF488022	Gabon	Cap Estérias
MH0722	Erythrophleum ivorense A. Chev.	Fabaceae (Caesalpinioideae)	0.3407	9.3492	Heuertz M			KF488023	Gabon	Pointe Denis
MH0728	Erythrophleum ivorense A. Chev.	Fabaceae (Caesalpinioideae)	0.3407	9.3492	Heuertz M			KF488024	Gabon	Pointe Denis
MH0755	Erythrophleum suaveolens (Guill. & Perr.) Brenan	Fabaceae (Caesalpinioideae)	-1.6252	12.2795	Heuertz M			KF488025	Gabon	Popa
MH1068	Erythrophleum suaveolens (Guill. & Perr.) Brenan	Fabaceae (Caesalpinioideae)	3.7695	13.6548	Daïnou K			KF488026	Cameroon	UFA 30
MH1073	Erythrophleum suaveolens (Guill. & Perr.) Brenan	Fabaceae (Caesalpinioideae)	3.8237	13.6371	Daïnou K			KF488027	Cameroon	UFA 30
MH1802	Erythrophleum suaveolens (Guill. & Perr.) Brenan	Fabaceae (Caesalpinioideae)	2.93323	12.8587	Daïnou K			KF488028	Cameroon	Lélé
MH1803	Erythrophleum suaveolens (Guill. & Perr.) Brenan	Fabaceae (Caesalpinioideae)	2.94466	12.8658	Daïnou K			KF488029	Cameroon	Lélé
OH0418	Erythrophleum suaveolens (Guill. & Perr.) Brenan	Fabaceae (Caesalpinioideae)	3.29187	14.1878	Hardy O			KF488030	Cameroon	Mindourou
OH0459	Erythrophleum suaveolens (Guill. & Perr.) Brenan	Fabaceae (Caesalpinioideae)	3.29187	14.1878	Hardy O			KF488031	Cameroon	Mindourou
OH0518	Erythrophleum ivorense A. Chev.	Fabaceae (Caesalpinioideae)	3.97029	9.26122	Hardy O	OH0518	YA/BRLU	KF488032	Cameroon	Limbe (Bimbia Community Forest)
OH0525	Erythrophleum ivorense A. Chev.	Fabaceae (Caesalpinioideae)	3.97029	9.26122	Hardy O			KF488033	Cameroon	Limbe (Bimbia Community Forest)
OH0688	Erythrophleum ivorense A. Chev.	Fabaceae (Caesalpinioideae)	5.07192	8.83585	Hardy O			KF488034	Cameroon	Korup plot
OH0717	Erythrophleum ivorense A. Chev.	Fabaceae (Caesalpinioideae)	5.0784	8.8586	Hardy O			KF488035	Cameroon	Korup NP
OH1578	Erythrophleum ivorense A. Chev.	Fabaceae (Caesalpinioideae)	-2.386	10.1742	Issembé Y			KF488036	Gabon	Doudou NP
OH1667	Erythrophleum ivorense A. Chev.	Fabaceae (Caesalpinioideae)	-2.389	10.149	Issembé Y			KF488037	Gabon	Doudou NP
MH0707	Greenwayodendron suaveolens (Engl. & Diels) Verdc.	Annonaceae	0.5439	9.3318	Heuertz M			KF488002	Gabon	Mondha forest
MH0784	Greenwayodendron suaveolens (Engl. & Diels) Verdc.	Annonaceae	-1.8625	13.8778	Heuertz M			KF488003	Gabon	Ossélé
MH0800	Greenwayodendron suaveolens (Engl. & Diels) Verdc.	Annonaceae	-1.8664	13.8765	Heuertz M			KF488004	Gabon	Ossélé
MH0836	Greenwayodendron suaveolens (Engl. & Diels) Verdc.	Annonaceae	-0.2167	11.582	Heuertz M			KF488005	Gabon	La Lopé
MH0924	Greenwayodendron suaveolens (Engl. & Diels) Verdc.	Annonaceae	-0.1671	11.5787	Heuertz M			KF488006	Gabon	La Lopé
MH0954	Greenwayodendron suaveolens (Engl. & Diels) Verdc.	Annonaceae	-2.6701	11.2517	Heuertz M			KF488007	Gabon	Douano
MH1021	Greenwayodendron suaveolens (Engl. & Diels) Verdc.	Annonaceae	-2.6503	11.2526	Heuertz M			KF488008	Gabon	Douano
MH1028	Greenwayodendron suaveolens (Engl. & Diels) Verdc.	Annonaceae	0.633	10.3731	Heuertz M			KF488009	Gabon	Crystal Mountains
MH1037	Greenwayodendron suaveolens (Engl. & Diels) Verdc.	Annonaceae	0.6328	10.3787	Heuertz M			KF488010	Gabon	Crystal Mountains
MH1415	Greenwayodendron suaveolens (Engl. & Diels) Verdc.	Annonaceae	2.3671	13.4192	Heuertz M			KF488011	Cameroon	Lélé
MH1422	Greenwayodendron suaveolens (Engl. & Diels) Verdc.	Annonaceae	2.3694	13.4214	Heuertz M			KF488012	Cameroon	Lélé
OH0105	Greenwayodendron suaveolens (Engl. & Diels) Verdc.	Annonaceae	0.5743	9.3349	Hardy O	OH8/OH0105	LBV	KF488013	Gabon	Mondha forest
OH1582	Greenwayodendron suaveolens (Engl. & Diels) Verdc.	Annonaceae	-2.7698	10.2247	Issembé Y	Gs2 / Issembé 1024	YA	KF488014	Gabon	Gamba
OH1587	Greenwayodendron suaveolens (Engl. & Diels) Verdc.	Annonaceae	-2.7858	10.1644	Issembé Y			KF488015	Gabon	Gamba
OH1594	Greenwayodendron suaveolens (Engl. & Diels) Verdc.	Annonaceae	-2.3862	10.1754	Issembé Y			KF488016	Gabon	Doudou NP
OH1597	Greenwayodendron suaveolens (Engl. & Diels) Verdc.	Annonaceae	-2.3865	10.193	Issembé Y			KF488017	Gabon	Doudou NP
C390	Milicia excelsa (Welw.) C.C.Berg	Moraceae	2.66624	13.273	Daïnou K			HM543798	Cameroon	Sud-Est
C393	Milicia excelsa (Welw.) C.C.Berg	Moraceae	2.61916	13.3349	Daïnou K			HM543799	Cameroon	Sud-Est
MH0764	Milicia excelsa (Welw.) C.C.Berg	Moraceae	-1.6354	12.2857	Heuertz M			HM543870	Gabon	Popa
MH0783	Milicia excelsa (Welw.) C.C.Berg	Moraceae	-1.6412	12.2906	Heuertz M			HM543871	Gabon	Popa
MH0914	Milicia excelsa (Welw.) C.C.Berg	Moraceae	-0.2199	11.5822	Heuertz M			HM543872	Gabon	La Lopé
MH0919	Milicia excelsa (Welw.) C.C.Berg	Moraceae	-0.1661	11.5785	Heuertz M			HM543873	Gabon	La Lopé
MH0923	Milicia excelsa (Welw.) C.C.Berg	Moraceae	-0.1671	11.5787	Heuertz M			HM543874	Gabon	La Lopé
MH0974	Milicia excelsa (Welw.) C.C.Berg	Moraceae	-2.6771	11.2501	Heuertz M			HM543875	Gabon	Douano
MH1006	Milicia excelsa (Welw.) C.C.Berg	Moraceae	-2.6444	11.2494	Heuertz M			HM543876	Gabon	Douano
MH1136	Milicia excelsa (Welw.) C.C.Berg	Moraceae	2.7764	14.1158	Daïnou K			HM543877	Cameroon	UFA 47
MH1140	Milicia excelsa (Welw.) C.C.Berg	Moraceae	2.8933	14.1076	Daïnou K			HM543878	Cameroon	UFA 47
OH0427	Milicia excelsa (Welw.) C.C.Berg	Moraceae	3.69944	13.6611	Hardy O			HM543879	Cameroon	Mindourou
OH0428	Milicia excelsa (Welw.) C.C.Berg	Moraceae	3.69944	13.6611	Hardy O			HM543880	Cameroon	Mindourou
OH0892	Milicia excelsa (Welw.) C.C.Berg	Moraceae	4.7987	9.6742	Moses S	Moses1632		HM543884	Cameroon	Mt Kupe, Mbulle
OH0894	Milicia excelsa (Welw.) C.C.Berg	Moraceae	4.7754	9.6839	Moses S	Moses1634		HM543885	Cameroon	Mt Kupe, Tombel
OH0898	Milicia excelsa (Welw.) C.C.Berg	Moraceae	4.7744	9.6832	Moses S	Moses1638		HM543886	Cameroon	Mt Kupe, Tombel
JD0110	Panda oleosa Pierre	Pandaceae	5.0662	8.8527	Duminil J			KF487990	Cameroon	Korup plot
MH0684	Panda oleosa Pierre	Pandaceae	1.5982	10.0369	Senterre & Ngomo	BS65	YA/BRLU	KF487991	Equatorial Guinea	Monte Alén
MH0803	Panda oleosa Pierre	Pandaceae	-1.8684	13.8777	Heuertz M			KF487992	Gabon	Ossélé
MH0915	Panda oleosa Pierre	Pandaceae	-0.2181	11.5824	Heuertz M			KF487993	Gabon	La Lopé
MH0975	Panda oleosa Pierre	Pandaceae	-2.6771	11.2501	Heuertz M			KF487994	Gabon	Douano
MH1003	Panda oleosa Pierre	Pandaceae	-2.6444	11.2494	Heuertz M			KF487995	Gabon	Douano
MH1408	Panda oleosa Pierre	Pandaceae	2.3668	13.4172	Heuertz M			KF487996	Cameroon	Lélé
MH1436	Panda oleosa Pierre	Pandaceae	2.3712	13.4271	Heuertz M			KF487997	Cameroon	Lélé
OH0122	Panda oleosa Pierre	Pandaceae	0.507	12.8004	Hardy O	OH25/OH122	LBV	KF487998	Gabon	Makokou - IRET
OH0797	Panda oleosa Pierre	Pandaceae	5.0662	8.8527	Hardy O	OH0797	YA/BRLU	KF487999	Cameroon	Korup plot
OH1600	Panda oleosa Pierre	Pandaceae	-2.786	10.1639	Issembé Y			KF488000	Gabon	Gamba
OH1601	Panda oleosa Pierre	Pandaceae	-2.7692	10.1518	Issembé Y			KF488001	Gabon	Gamba
MH0737	Scorodophloeus zenkeri Harms	Fabaceae (Caesalpinioideae)	-1.615	12.2716	Heuertz M			KF487977	Gabon	Popa
MH0753	Scorodophloeus zenkeri Harms	Fabaceae (Caesalpinioideae)	-1.6172	12.2762	Heuertz M			KF487978	Gabon	Popa
MH0884	Scorodophloeus zenkeri Harms	Fabaceae (Caesalpinioideae)	-1.0649	12.3021	Heuertz M			KF487979	Gabon	Koulamoutou-Banati, 20km W of Koulamoutou
MH0898	Scorodophloeus zenkeri Harms	Fabaceae (Caesalpinioideae)	-1.0646	12.2991	Heuertz M			KF487980	Gabon	Koulamoutou-Banati, 20km W of Koulamoutou
MH0955	Scorodophloeus zenkeri Harms	Fabaceae (Caesalpinioideae)	-2.6701	11.2517	Heuertz M			KF487981	Gabon	Douano
MH0971	Scorodophloeus zenkeri Harms	Fabaceae (Caesalpinioideae)	-2.6756	11.2509	Heuertz M			KF487982	Gabon	Douano
MH1419	Scorodophloeus zenkeri Harms	Fabaceae (Caesalpinioideae)	2.3688	13.4204	Heuertz M			KF487983	Cameroon	Lélé
MH1912	Scorodophloeus zenkeri Harms	Fabaceae (Caesalpinioideae)	3.2637	10.9085	Nguembou C			KF487984	Cameroon	Akom II
OH0114	Scorodophloeus zenkeri Harms	Fabaceae (Caesalpinioideae)	0.0085	12.7997	Hardy O	OH17/OH0114	LBV	KF487985	Gabon	Makokou - IRET
OH0872	Scorodophloeus zenkeri Harms	Fabaceae (Caesalpinioideae)	-2.4762	19.4202	Jean-Louis?			KF487986	Congo DR
OH0883	Scorodophloeus zenkeri Harms	Fabaceae (Caesalpinioideae)	2.7499	10.5403	Droissart V			KF487987	Cameroon	Akom II
OH1630	Scorodophloeus zenkeri Harms	Fabaceae (Caesalpinioideae)	-2.3832	10.1709	Issembé Y			KF487988	Gabon	Doudou NP
OH1632	Scorodophloeus zenkeri Harms	Fabaceae (Caesalpinioideae)	-2.3795	10.1777	Issembé Y			KF487989	Gabon	Doudou NP
MH0713	Symphonia globulifera L.f.	Clusiaceae	0.5367	9.349	Heuertz M			KF488038	Gabon	road Cap Estérias - Santa Clara
MH0717	Symphonia globulifera L.f.	Clusiaceae	0.3407	9.3492	Heuertz M			KF488039	Gabon	Pointe Denis
MH0730	Symphonia globulifera L.f.	Clusiaceae	0.3407	9.3492	Heuertz M			KF488040	Gabon	Pointe Denis
MH0787	Symphonia globulifera L.f.	Clusiaceae	-1.8629	13.8771	Heuertz M			KF488041	Gabon	Ossélé
MH0966	Symphonia globulifera L.f.	Clusiaceae	-2.6746	11.2508	Heuertz M			KF488042	Gabon	Douano
MH1007	Symphonia globulifera L.f.	Clusiaceae	-2.6444	11.2494	Heuertz M			KF488043	Gabon	Douano
MH2101	Symphonia globulifera L.f.	Clusiaceae	2.7635	13.0854	Daïnou K			KF488044	Cameroon	Mbouma
MH2102	Symphonia globulifera L.f.	Clusiaceae	2.7805	13.0848	Daïnou K			KF488045	Cameroon	Mbouma
OH0100	Symphonia globulifera L.f.	Clusiaceae	0.5803	9.3505	Hardy O	OH3/OH0100	LBV	KF488046	Gabon	Mondha forest
OH0137	Symphonia globulifera L.f.	Clusiaceae	0.5055	12.7919	Hardy O			KF488047	Gabon	Makokou - IRET
OH0523	Symphonia globulifera L.f.	Clusiaceae	3.97029	9.26122	Hardy O	OH0523	YA/BRLU	KF488048	Cameroon	Limbe (Bimbia Community Forest)
OH0649	Symphonia globulifera L.f.	Clusiaceae	5.07192	8.83585	Hardy O	OH0649	YA/BRLU	KF488049	Cameroon	Korup plot
OH0650	Symphonia globulifera L.f.	Clusiaceae	5.07192	8.83585	Hardy O			KF488050	Cameroon	Korup plot
OH0671	Symphonia globulifera L.f.	Clusiaceae	5.08806	8.85744	Hardy O			KF488051	Cameroon	Korup NP
OH0672	Symphonia globulifera L.f.	Clusiaceae	5.08806	8.85744	Hardy O			KF488052	Cameroon	Korup NP
OH0789	Symphonia globulifera L.f.	Clusiaceae	5.07192	8.83585	Hardy O			KF488053	Cameroon	Korup plot
OH0790	Symphonia globulifera L.f.	Clusiaceae	5.07192	8.83585	Hardy O			KF488054	Cameroon	Korup plot
OH1636	Symphonia globulifera L.f.	Clusiaceae	-2.9638	10.3026	Issembé Y			KF488055	Gabon	Gamba
OH1637	Symphonia globulifera L.f.	Clusiaceae	-2.9341	10.2627	Issembé Y			KF488056	Gabon	Gamba
LD0004	Strombosiopsis tetrandra Engl.	Olacaceae	3.1808	12.8148	Danhaive L			KF487961	Cameroon	Dja Biosphere Reserve
MH0680	Strombosiopsis tetrandra Engl.	Olacaceae	3.1808	12.8148	Senterre & Kouob	BS1226	YA/BRLU	KF487962	Cameroon	Dja Biosphere Reserve
MH0733	Strombosiopsis tetrandra Engl.	Olacaceae	-1.6153	12.2707	Heuertz M			KF487963	Gabon	Popa
MH0762	Strombosiopsis tetrandra Engl.	Olacaceae	-1.632	12.2832	Heuertz M			KF487964	Gabon	Popa
MH1223	Strombosiopsis tetrandra Engl.	Olacaceae	1.61	10.0964	Senterre & Nguema	BS3111	BRLU	KF487965	Equatorial Guinea	Monte Alén NP
MH1896	Strombosiopsis tetrandra Engl.	Olacaceae	3.2696	10.8978	Nguembou C			KF487966	Cameroon	Akom II
MH2107	Strombosiopsis tetrandra Engl.	Olacaceae	2.3727	13.4276	Daïnou K			KF487967	Cameroon	Lélé
OH0520	Strombosiopsis tetrandra Engl.	Olacaceae	3.9768	9.267	Hardy O	OH0520	YA/BRLU	KF487968	Cameroon	Limbe (Bimbia Community Forest)
OH0753	Strombosiopsis tetrandra Engl.	Olacaceae	5.0691	8.8596	Hardy O			KF487969	Cameroon	Korup NP
OH0758	Strombosiopsis tetrandra Engl.	Olacaceae	5.0691	8.8596	Hardy O			KF487970	Cameroon	Korup NP
OH0891	Strombosiopsis tetrandra Engl.	Olacaceae	4.7944	9.68	Moses S			KF487971	Cameroon	Mt Koupe
OH0900	Strombosiopsis tetrandra Engl.	Olacaceae	4.7944	9.68	Moses S			KF487972	Cameroon	Mt Koupe
OH0908	Strombosiopsis tetrandra Engl.	Olacaceae	5.0691	8.8596	Moses S			KF487973	Cameroon	Korup NP
OH0911	Strombosiopsis tetrandra Engl.	Olacaceae	5.0691	8.8596	Moses S			KF487974	Cameroon	Korup NP
TS0016	Strombosiopsis tetrandra Engl.	Olacaceae	0.6105	10.385	Stevart T			KF487975	Gabon	Crystal Mountains
TS0025	Strombosiopsis tetrandra Engl.	Olacaceae	0.6187	10.376	Stevart T			KF487976	Gabon	Crystal Mountains
MH0700	Trichoscypha acuminata Engl.	Anacardiaceae	0.5439	9.3318	Heuertz M	MH7/MH0700	LBV/BRLU	KF487942	Gabon	Mondha forest
MH0746	Trichoscypha acuminata Engl.	Anacardiaceae	-1.6139	12.2752	Heuertz M			KF487943	Gabon	Popa
MH0780	Trichoscypha acuminata Engl.	Anacardiaceae	-1.651	12.2907	Heuertz M			KF487944	Gabon	Popa
MH0824	Trichoscypha acuminata Engl.	Anacardiaceae	-0.216	11.5834	Heuertz M			KF487945	Gabon	La Lopé
MH0978	Trichoscypha acuminata Engl.	Anacardiaceae	-2.6701	11.2517	Heuertz M			KF487946	Gabon	Douano
MH0980	Trichoscypha acuminata Engl.	Anacardiaceae	-2.6687	11.2524	Heuertz M			KF487947	Gabon	Douano
MH1585	Trichoscypha acuminata Engl.	Anacardiaceae	2.6761	10.8233	Heuertz M			KF487948	Cameroon	Messama3
MH1591	Trichoscypha acuminata Engl.	Anacardiaceae	2.802	10.5272	Heuertz M	MH1591	LBV/BRLU	KF487949	Cameroon	Nkong Mekak
OH0104	Trichoscypha acuminata Engl.	Anacardiaceae	0.5748	9.3347	Hardy O	OH7/OH0104	LBV	KF487950	Gabon	Mondha forest
OH0125	Trichoscypha acuminata Engl.	Anacardiaceae	0.504	12.7953	Hardy O	OH28/OH0125	LBV	KF487951	Gabon	Makokou - IRET
OH0141	Trichoscypha acuminata Engl.	Anacardiaceae	-0.2048	11.612	Hardy O			KF487952	Gabon	Lopé
OH0412	Trichoscypha acuminata Engl.	Anacardiaceae	3.69944	13.6611	Hardy O			KF487953	Cameroon	Mindourou
OH0426	Trichoscypha acuminata Engl.	Anacardiaceae	3.69944	13.6611	Hardy O			KF487954	Cameroon	Mindourou
OH0681	Trichoscypha acuminata Engl.	Anacardiaceae	5.06642	8.85675	Hardy O			KF487955	Cameroon	Korup plot
OH0682	Trichoscypha acuminata Engl.	Anacardiaceae	5.0713	8.8635	Hardy O			KF487956	Cameroon	Korup NP
OH0686	Trichoscypha acuminata Engl.	Anacardiaceae	5.0668	8.8586	Hardy O			KF487957	Cameroon	Korup NP
OH0687	Trichoscypha acuminata Engl.	Anacardiaceae	5.06642	8.85675	Hardy O	OH0687	YA/BRLU	KF487958	Cameroon	Korup plot
OH1639	Trichoscypha acuminata Engl.	Anacardiaceae	-2.7729	10.1494	Issembé Y			KF487959	Gabon	Gamba
OH1648	Trichoscypha acuminata Engl.	Anacardiaceae	-2.7408	10.114	Issembé Y			KF487960	Gabon	Gamba
	Trichoscypha acuminata Engl.							KF487839 - KF487893
	Symphonia globulifera L.f.							KF487894 - KF487941
