# Supplementary material for: Comparative Phylogeography in Rainforest Trees from Lower Guinea, Africa
Source: PLoS One. 2014 Jan 8;9(1):e84307. doi: 10.1371/journal.pone.0084307 (PMC3885573; doi:10.1371/journal.pone.0084307)
Supplement: Table S4 — Details on coalescent simulation results. (XLSX) [file pone.0084307.s004.xlsx]

## Sheet: Sheet1
	Fastsimcoal Parameters
Data/ scenario	N	t1	t2	t3	mu		n/pop	haps/pop	S	h	Fst	Fraction of samples with significant Fst (1-sided test, Pval <0.05)
Dataset 1							7.89	2.73	5.8	0.49	0.166	0.285714
Divergence A 1	10000	1	200	1600	2e-08	av	8	2.55319	2.92553	0.465425	0.0515147	0.07706
						mode	8	2	2	0.25	0
						min	8	1	1	0	-0.142857
						max	8	6	8	0.928571	0.544218
Divergence A 2	10000	1	200	1600	5e-08	av	8	3.68	6.9	0.661071	0.0551925	0.1034
						mode	8	3	5	0.75	0.00644337
						min	8	1	1	0	-0.142857
						max	8	8	19	1	0.827586
Divergence A 3	2000	1	200	1600	1e-07	av	8	2.44845	3.38144	0.441826	0.187469	0.257732
						mode	8	2	2	0.25	0.142857
						min	8	1	1	0	-0.130785
						max	8	5	11	0.857143	1
Divergence A 4	1000	1	200	1600	5e-08	av	8	1.85106	1.74468	0.304521	0.215132	0.169492
						mode	8	2	1	0	0.142857
						min	8	1	1	0	-0.037037
						max	8	3	4	0.75	1
Divergence A 5	1000	1	200	1600	1e-07	av	8	2.04598	2.44828	0.339286	0.253054	0.37931
						mode	8	2	2	0.25	0.2
						min	8	1	1	0	-0.142857
						max	8	5	8	0.821429	0.888889
Divergence A 6	1000	1	200	1600	5e-07	av	8	3.615	10.17	0.648929	0.430102	0.85
						mode	8	3	9	0.75	0.409841
						min	8	1	2	0	0
						max	8	7	23	0.964286	0.969697
Divergence A 7	5000	1	200	1600	1e-07	av	8	3.715	8.34	0.686607	0.114534	0.23
						mode	8	4	5	0.75	0.0927319
						min	8	1	1	0	-0.116883
						max	8	8	23	1	0.812784
Divergence A 8	5000	1	200	1600	1e-07	av	30	6.17	11.86	0.686287	0.128826	0.73
						mode	30	6	8	0.691954	0.103382
						min	30	2	3	0.066667	-0.0165
						max	30	12	23	0.894253	0.481228
Divergence A 9	2000	1	200	1600	1e-07	av	30	3.53	5.59	0.439126	0.189723	0.73
						mode	30	3	6	0.066667	0.139498
						min	30	1	1	0	-0.0308402
						max	30	8	12	0.811494	0.758621
Constant B 1	1000	1			1e-07	av	8	1.97959	1.57143	0.352405	-0.00736374	0
						mode	8	2	1	0.25	0
						min	8	1	1	0	-0.142857
						max	8	4	4	0.821429	0.285714
Constant B 2	2000	1			1e-07	av	8	2.22917	1.95833	0.417163	0.00180258	0.0138889
						mode	8	2	1	0.25	0
						min	8	1	1	0	-0.142857
						max	8	5	5	0.892857	0.506494
Constant B 3	2000	1			1e-06	av	8	4.73	12.64	0.79375	-0.00709152	0.04
						mode	8	5	13	0.892857	-0.038665
						min	8	1	1	0	-0.139147
						max	8	7	32	0.964286	0.380952
Constant B 4	2000	1			1e-06	av	30	9.12	17.13	0.797897	-0.0056891	0.04
						mode	30	8	14	0.827586	-0.0130174
						min	30	4	7	0.252874	-0.0328485
						max	30	16	39	0.942529	0.136328
